# Supplementary material for: Antihypertensive Effects of Corn Silk Extract and Its Novel Bioactive Constituent in Spontaneously Hypertensive Rats: The Involvement of Angiotensin-Converting Enzyme Inhibition
Source: PubMed Central journal article supplement (PMC6572293; doi:10.3390/molecules24101886), 2019-05-16
Supplement: molecules-24-01886-s001.pdf [file molecules-24-01886-s001.pdf]

# Antihypertensive Effects of Corn Silk Extract and Its Novel Bioactive Constituent in Spontaneously Hypertensive Rats: The Involvement of Angiotensin-Converting Enzyme Inhibition

Chia-Cheng Li <sup>1</sup>, Yu-Chen Lee <sup>2,3</sup>, Hsin-Yi Lo <sup>1</sup>, Yu-Wen Huang <sup>4</sup>, Chien-Yun Hsiang <sup>5,\*</sup> and Tin-Yun Ho <sup>1,6,\*</sup>

<sup>1</sup> Graduate Institute of Chinese Medicine, China Medical University, Taichung 40402, Taiwan; u9551002@gmail.com (C.C.L.); hsinyilo0123@gmail.com (H.Y.L.)

<sup>2</sup> Graduate Institute of Acupuncture Science, China Medical University, Taichung 40402, Taiwan; d5167@mail.cmuh.org.tw

<sup>3</sup> Department of Chinese Medicine, China Medical University Hospital, Taichung 40447, Taiwan

<sup>4</sup> Graduate Institute of Biomedical Sciences, China Medical University, Taichung 40402, Taiwan; cute830811@yahoo.com.tw

<sup>5</sup> Department of Microbiology and Immunology, China Medical University, Taichung 40402, Taiwan

<sup>6</sup> Department of Health and Nutrition Biotechnology, Asia University, Taichung 41354, Taiwan

\* Correspondence: cyhsiang@mail.cmu.edu.tw (C.Y.H.); tyh@mail.cmu.edu.tw (T.Y.H.)

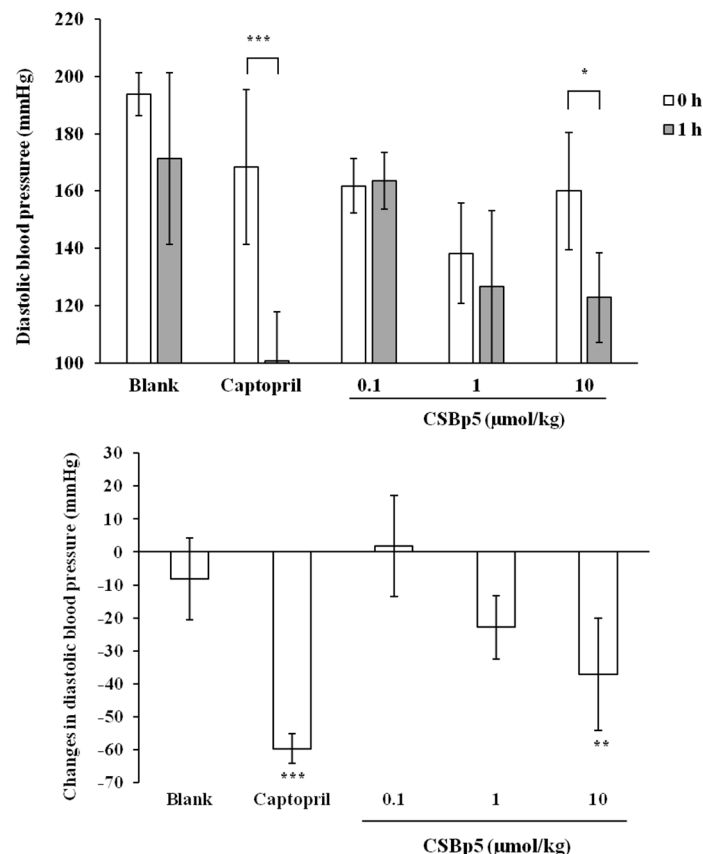

**Figure S1.** Effects of CSBp5 on diastolic blood pressure. SHR were orally given with 10 μmol/kg captopril or various dosages of CSBp5. Tail diastolic blood pressure was measured at 0 and 1 h. Data are expressed as diastolic blood pressure (mmHg) (top panel) or changes in diastolic blood pressure (mmHg) (bottom panel). Values are mean ± standard error (n=6). \* $p < 0.05$ , \*\* $p < 0.01$ , \*\*\* $p < 0.001$ , compared with SBP at 0 h (top panel) or with blank (bottom panel).
